# Supplementary material for: Genome-wide identification of novel expression signatures reveal distinct patterns and prevalence of binding motifs for p53, nuclear factor-κB and other signal transcription factors in head and neck squamous cell carcinoma
Source: Springer Nature journal article supplement (doi:10.1186/gb-2007-8-5-r78), 2007-05-11
Supplement: Additional file 1 [file gb-2007-8-5-r78-s1.pdf]

Supplemental Table S1. Gene list of cluster C overexpressed in HNSCC

| Symbol <sup>1</sup> | Gene description                                                          | Cytogenetic<br>Location | Fold Change        |                              |                        |
|---------------------|---------------------------------------------------------------------------|-------------------------|--------------------|------------------------------|------------------------|
|                     |                                                                           |                         | Tumor <sup>1</sup> | wt p53-<br>like <sup>2</sup> | mt<br>p53 <sup>3</sup> |
| CRABP2              | cellular retinoic acid binding protein 2                                  | 1q21.3                  | 2.89               | 1.61                         | 4.16                   |
| IL22RA1             | interleukin 22 receptor                                                   | 1p36.11                 | 3.13               | 2.30                         | 3.96                   |
| CDW52               | CDW52 antigen (CAMPATH-1 antigen)                                         | 1p36                    | 2.22               | 1.88                         | 2.56                   |
| RARRES3             | retinoic acid receptor responder (tazarotene induced) 3                   | 11q23                   | 3.31               | 2.43                         | 4.18                   |
| APOL1               | apolipoprotein L, 1                                                       | 22q13.1                 | 3.27               | 3.04                         | 3.49                   |
| UBE2D4              | ubiquitin-conjugating enzyme HBUCE1                                       | 7p13                    | 2.78               | 2.66                         | 2.90                   |
| APOL3               | apolipoprotein L, 3                                                       | 22q13.1                 | 3.63               | 3.71                         | 3.55                   |
| CGI-49              | CGI-49 protein                                                            | 1q44                    | 2.07               | 2.23                         | 1.91                   |
| SGCE                | sarcoglycan, epsilon                                                      | 7q21-q22                | 2.03               | 1.96                         | 2.09                   |
| ALDH1A1             | aldehyde dehydrogenase 1 family, member A1                                | 9q21                    | 6.32               | 2.21                         | 10.43                  |
| NQO1                | NAD(P)H dehydrogenase, quinone 1                                          | 16q22.1                 | 2.51               | 2.26                         | 2.76                   |
| ALP                 | alpha-actinin-2-associated LIM protein                                    | 4q35                    | 2.36               | 2.12                         | 2.60                   |
| FOXE1               | forkhead box E1 (thyroid transcription factor 2)                          | 9q22                    | 2.06               | 1.91                         | 2.21                   |
| CRIP1               | cysteine-rich protein 1 (intestinal)                                      | 7q11.23                 | 2.22               | 1.72                         | 2.72                   |
| KCNJ8               | potassium inwardly-rectifying channel, subfamily J, member 8              | 12p11.23                | 2.03               | 2.16                         | 1.90                   |
| ISYNA1              | myo-inositol 1-phosphate synthase A1                                      | 19p13.12                | 2.20               | 2.17                         | 2.23                   |
| PIK3R3              | phosphoinositide-3-kinase, regulatory subunit, polypeptide 3 (p55, gamma) | 1pter-p32.1             | 2.32               | 1.86                         | 2.77                   |
| EPS8                | epidermal growth factor receptor pathway substrate 8                      | 12q23-q24               | 2.52               | 3.29                         | 1.75                   |
| SIM2                | single-minded homolog 2 (Drosophila)                                      | 21q22.13                | 2.81               | 2.79                         | 2.83                   |
| MAPK8IP1            | mitogen-activated protein kinase 8 interacting protein 1                  | 11p12-p11.2             | 2.15               | 2.15                         | 2.16                   |
| CBX6                | chromobox homolog 6                                                       | 22q13.1                 | 2.17               | 1.87                         | 2.46                   |
| LAMP3               | lysosomal-associated membrane protein 3                                   | 3q26.3-q27              | 3.09               | 2.27                         | 3.91                   |
| MYO5B               | myosin VB                                                                 | 18q21                   | 2.49               | 2.01                         | 2.97                   |
| TSPAN13             | Tetraspanin 13                                                            | 7p21.1                  | 2.24               | 2.20                         | 2.28                   |
| IMP-3               | IGF-II mRNA-binding protein 3                                             | 7p11                    | 1.97               | 1.91                         | 2.03                   |
| HOXA13              | homeo box A13                                                             | 7p15-p14                | 2.01               | 1.69                         | 2.33                   |
| TARBP1              | TAR (HIV) RNA binding protein 1                                           | 1p                      | 1.76               | 1.51                         | 2.00                   |
| GBAS                | glioblastoma amplified sequence                                           | 7p12                    | 1.87               | 1.69                         | 2.04                   |
| CEP1                | centrosomal protein 1                                                     | 9q33-q34                | 2.47               | 2.05                         | 2.88                   |
| TAX1BP1             | Tax1 (human T-cell leukemia virus type I) binding protein 1               | 7p15                    | 2.00               | 2.08                         | 1.91                   |
| HIBADH              | 3-hydroxyisobutyrate dehydrogenase                                        | 7p15.2                  | 2.04               | 2.29                         | 1.79                   |
| CLDN4               | claudin 4                                                                 | 7q11.23                 | 3.19               | 3.41                         | 2.97                   |
| CLDN3               | claudin 3                                                                 | 7q11.23                 | 6.61               | 7.74                         | 5.49                   |
| MDK                 | midkine (neurite growth-promoting factor 2)                               | 11p11.2                 | 2.53               | 2.35                         | 2.72                   |
| KIAA1102            | KIAA1102 protein                                                          | 4p13                    | 5.14               | 4.47                         | 5.81                   |
| MEIS2               | Meis1, myeloid ecotropic viral integration site 1 homolog 2 (mouse)       | 15q13.2                 | 2.24               | 1.81                         | 2.66                   |
| NFIL3               | nuclear factor, interleukin 3 regulated                                   | 9q22                    | 1.94               | 1.85                         | 2.03                   |
| LMO7                | LIM domain only 7                                                         | 13q21.33                | 3.47               | 2.69                         | 4.26                   |
| HRASLS3             | HRAS-like suppressor 3                                                    | 11q12.3                 | 2.11               | 1.96                         | 2.27                   |
| RPS6KA5             | ribosomal protein S6 kinase, 90kD, polypeptide 5                          | 14q31-q32.1             | 2.35               | 1.75                         | 2.94                   |
| RAB22A              | RAB22A, member RAS oncogene family                                        | 20q13.32                | 2.37               | 1.72                         | 3.02                   |
| DNM1                | dynamamin 1                                                               | 9q34                    | 1.86               | 1.42                         | 2.31                   |
| GPX4                | glutathione peroxidase 4 (phospholipid hydroperoxidase)                   | 19p13.3                 | 1.76               | 1.31                         | 2.20                   |
| BCAN                | chondroitin sulfate proteoglycan BEHAB/brevican                           | 1q31                    | 5.83               | 2.78                         | 8.87                   |
| NCOA3               | nuclear receptor coactivator 3                                            | 20q12                   | 1.78               | 1.56                         | 2.00                   |
| CCND1               | cyclin D1 (PRAD1; parathyroid adenomatosis 1)                             | 11q13                   | 2.38               | 1.73                         | 3.04                   |
| GDA                 | guanine deaminase                                                         | 9q21.11-21.33           | 4.80               | 3.18                         | 6.43                   |
| CHK                 | choline kinase                                                            | 11cen-q12.1             | 2.70               | 2.53                         | 2.86                   |
| CCS                 | copper chaperone for superoxide dismutase                                 | 11q13                   | 2.05               | 1.84                         | 2.25                   |
| FBXL11              | F-box and leucine-rich repeat protein 11                                  | 11q13.2                 | 2.68               | 2.56                         | 2.81                   |
| CIT                 | citron (rho-interacting, serine/threonine kinase 21)                      | 12q                     | 2.42               | 2.28                         | 2.57                   |

|                   |                                                                    |               |       |       |       |
|-------------------|--------------------------------------------------------------------|---------------|-------|-------|-------|
| NDUFV1            | NADH dehydrogenase (ubiquinone) flavoprotein 1 (51kD)              | 11q13         | 1.98  | 1.93  | 2.03  |
| GPR56             | G protein-coupled receptor 56                                      | 16q13         | 1.76  | 1.51  | 2.00  |
| <i>Cluster C1</i> |                                                                    |               |       |       |       |
| NOT56L            | Not56 ( <i>D. melanogaster</i> )-like protein                      | 3q26.1-q26.33 | 1.83  | 1.65  | 2.01  |
| OGFR              | opioid growth factor receptor                                      | 20q13.3       | 1.85  | 1.55  | 2.16  |
| HIST1H2AL         | H2A histone family, member I                                       | 6p22-p21.3    | 2.08  | 1.57  | 2.60  |
| IFI30             | interferon, gamma-inducible protein 30                             | 19p13.1       | 2.02  | 1.74  | 2.30  |
| ERBB3             | v-erb-b2 erythroblastic leukemia viral oncogene homolog 3          | 12q13         | 1.74  | 1.46  | 2.02  |
| ELTD1             | EGF-TM7-latrophilin-related protein                                | 1p33-p32      | 1.77  | 1.41  | 2.13  |
| LBP-32            | LBP protein 32                                                     | 2p25.2        | 2.27  | 1.96  | 2.58  |
| IGFBP3            | insulin-like growth factor binding protein 3                       | 7p13-p12      | 33.12 | 15.91 | 50.34 |
| HINT1             | histidine triad nucleotide-binding protein                         | 5q31.2        | 1.97  | 1.78  | 2.17  |
| PIN1              | protein (peptidyl-prolyl cis/trans isomerase) NIMA-interacting 1   | 19p13         | 1.84  | 1.42  | 2.25  |
| NUP214            | nucleoporin 214kD (CAIN)                                           | 9q34.1        | 1.94  | 1.63  | 2.25  |
| REA               | B-cell associated protein                                          | 12p13         | 1.94  | 1.59  | 2.28  |
| SULT1A1           | phenol-preferring phenol sulfotransferase1                         | 16p12.1       | 2.07  | 1.74  | 2.41  |
| GCA               | granulocytin, EF-hand calcium binding protein                      | 2q24.3        | 2.11  | 1.60  | 2.61  |
| CREG              | cellular repressor of E1A-stimulated genes                         | 1q24          | 2.60  | 2.03  | 3.16  |
| P5CR2             | pyrroline 5-carboxylate reductase isoform                          | 1q42.13       | 1.65  | 1.26  | 2.03  |
| SCHIP1            | schwannomin interacting protein 1                                  | 3q26.1        | 2.14  | 1.60  | 2.69  |
| C20orf99          | chromosome 20 open reading frame 99                                | 20p13-p12.2   | 1.92  | 1.45  | 2.38  |
| RISC              | serine carboxypeptidase 1                                          | 17q23.2       | 2.01  | 1.72  | 2.29  |
| ALDH3A2           | aldehyde dehydrogenase 3 family, member A2                         | 17p11.2       | 1.74  | 1.36  | 2.11  |
| RALGDS            | ral guanine nucleotide dissociation stimulator                     | 9q34          | 1.99  | 1.41  | 2.58  |
| TSC1              | tuberous sclerosis 1                                               | 9q34          | 1.72  | 1.44  | 2.00  |
| PDK2              | pyruvate dehydrogenase kinase, isoenzyme 2                         | 17q21.33      | 2.31  | 1.78  | 2.84  |
| HDAC5             | histone deacetylase 5                                              | 17q21         | 2.02  | 1.28  | 2.76  |
| RABGAP1           | RAB GTPase activating protein 1                                    | 9q33.2-q33.3  | 1.76  | 1.34  | 2.19  |
| CALR              | calreticulin                                                       | 19p13.3-p13.2 | 2.21  | 1.39  | 3.03  |
| SNCAIP            | synuclein, alpha interacting protein (synphilin)                   | 5q23.1-q23.3  | 1.80  | 1.23  | 2.37  |
| ZNF297B           | zinc finger protein 297B                                           | 9p24.1-q22.33 | 1.61  | 1.18  | 2.05  |
| NFATC3            | cytoplasmic nuclear factor of activated T-cells 3                  | 16q13-q24     | 1.64  | 1.28  | 2.01  |
| MAGEF1            | MAGEF1 protein                                                     | 3q13          | 2.94  | 1.80  | 4.08  |
| F8                | coagulation factor VIII                                            | Xq28          | 2.06  | 1.43  | 2.70  |
| SIRT7             | silencing information regulator 2-like                             | 17q25         | 1.68  | 1.26  | 2.09  |
| SURF1             | surfeit 1                                                          | 9q33-q34      | 1.99  | 1.83  | 2.15  |
| HEXA              | hexosaminidase A (alpha polypeptide)                               | 15q23-q24     | 1.88  | 1.70  | 2.07  |
| GOLGA1            | golgi autoantigen, golgin subfamily a, 1                           | 9q34.11       | 2.02  | 1.78  | 2.27  |
| GAA               | acid alpha-glucosidase                                             | 17q25.2-q25.3 | 3.50  | 2.64  | 4.35  |
| DAZAP2            | DAZ associated protein 2                                           | 2q33-q34      | 2.01  | 1.63  | 2.39  |
| MCCC1             | methylcrotonoyl-Coenzyme A carboxylase 1 (alpha)                   | 3q27          | 3.02  | 2.17  | 3.88  |
| DVL3              | dishevelled, dsh homolog 3 ( <i>Drosophila</i> )                   | 3q27          | 2.18  | 1.62  | 2.75  |
| ALDH3B2           | aldehyde dehydrogenase 3 family, member B2                         | 11q13         | 2.00  | 1.89  | 2.10  |
| NCOA1             | nuclear receptor coactivator 1                                     | 2p23          | 1.79  | 1.53  | 2.04  |
| HOXD9             | homeo box D9                                                       | 2q31-q37      | 2.41  | 1.83  | 2.99  |
| HOXD10            | homeo box D10                                                      | 2q31.1        | 2.31  | 2.01  | 2.62  |
| PLA2G4B           | phospholipase A2, group IVB (cytosolic)                            | 15q11.2-q21.3 | 1.70  | 1.05  | 2.34  |
| EPHX1             | epoxide hydrolase 1, microsomal (xenobiotic)                       | 1q42.1        | 2.65  | 1.46  | 3.84  |
| MPHOSPH9          | M-phase phosphoprotein 9                                           | 12q24.31      | 1.63  | 1.23  | 2.02  |
| BDG29             | BDG-29 proten                                                      | 16q24.2       | 1.74  | 1.37  | 2.11  |
| TFRC              | transferrin receptor (p90, CD71)                                   | 3q26.2-qter   | 2.97  | 3.38  | 2.56  |
| HSUP1             | Similar to RPE-spondin                                             | 20q13.13      | 2.52  | 2.74  | 2.30  |
| PTGES             | prostaglandin E synthase                                           | 9q34.3        | 2.70  | 2.93  | 2.47  |
| ADPRTL3           | ADP-ribosyltransferase (NAD+; poly (ADP-ribose) polymerase)-like 3 | 3p22.2-p21.1  | 4.52  | 5.56  | 3.48  |

|                   |                                                                                                                                  |                                 |             |             |             |
|-------------------|----------------------------------------------------------------------------------------------------------------------------------|---------------------------------|-------------|-------------|-------------|
| PODXL             | podocalyxin-like                                                                                                                 | 7q32-q33                        | 4.16        | 3.56        | 4.76        |
| GPR109B           | G protein-coupled receptor 109B                                                                                                  | 12q24.31                        | 3.12        | 2.94        | 3.30        |
| USP11             | ubiquitin specific protease 11                                                                                                   | 1q21                            | 2.51        | 2.18        | 2.85        |
| CDT1              | DNA replication factor                                                                                                           | 16q24                           | 2.07        | 1.76        | 2.38        |
| EIF4G1            | eukaryotic translation initiation factor 4 gamma, 1                                                                              | 3q27-qter                       | 3.26        | 2.93        | 3.60        |
| ANXA13            | annexin A13                                                                                                                      | 8q24.1-q24.2                    | 2.24        | 2.04        | 2.44        |
| ADA               | adenosine deaminase                                                                                                              | 20q12-q13.11                    | 2.26        | 2.16        | 2.36        |
| PCCB              | propionyl Coenzyme A carboxylase, beta polypeptide                                                                               | 3q21-q22<br>20q11.22-<br>q11.23 | 2.95        | 2.73        | 3.16        |
| C20orf104         | chromosome 20 open reading frame 104<br>prostaglandin-endoperoxide synthase 1 (prostaglandin G/H synthase and<br>cyclooxygenase) | 9q32-q33.3                      | 2.71        | 2.46        | 2.97        |
| PTGS1             |                                                                                                                                  |                                 |             |             |             |
| DHODH             | dihydroorotate dehydrogenase                                                                                                     | 16q22                           | 2.53        | 2.36        | 2.69        |
| DOLPP1            | Dolichyl pyrophosphate phosphatase 1                                                                                             | 9q34.1                          | 2.19        | 1.83        | 2.55        |
| NEU1              | sialidase 1 (lysosomal sialidase)                                                                                                | 6p21.3                          | 1.90        | 1.67        | 2.12        |
| USP13             | ubiquitin specific protease 13 (isopeptidase T-3)                                                                                | 3q26.2-q26.3                    | 2.01        | 2.38        | 1.65        |
| MSX1              | msh homeo box homolog 1 (Drosophila)                                                                                             | 4p16.3-p16.1                    | 2.46        | 2.97        | 1.95        |
| CYB561            | cytochrome b-561                                                                                                                 | 17q11-qter                      | 2.18        | 2.59        | 1.77        |
| TBX5              | T-box 5                                                                                                                          | 12q24.1                         | 2.00        | 2.33        | 1.67        |
| APBA2BP           | amyloid beta (A4) precursor protein-binding, family A, member 2 binding<br>protein                                               | 20q11.22                        | 1.96        | 2.01        | 1.91        |
| HIST1H4C          | H4 histone family, member G                                                                                                      | 6p21.3                          | 2.73        | 3.25        | 2.21        |
| HIST1H4B          | H4 histone family, member I                                                                                                      | 6p21.3                          | 1.96        | 2.21        | 1.70        |
| HIST1H4E          | H4 histone family, member J                                                                                                      | 6p21.3                          | 1.90        | 2.01        | 1.79        |
| SMC2L1            | SMC2 structural maintenance of chromosomes 2-like 1 (yeast)                                                                      | 9q31.1                          | 1.87        | 2.12        | 1.62        |
| B4GALT5           | UDP-Gal:betaGlcNAc beta 1,4- galactosyltransferase, polypeptide 5                                                                | 20q13.1-q13.2                   | 2.03        | 1.95        | 2.11        |
| ESPL1             | extra spindle poles like 1 (S. cerevisiae)                                                                                       | 12q                             | 1.87        | 1.72        | 2.02        |
| <i>Cluster C2</i> |                                                                                                                                  |                                 |             |             |             |
| <b>TRAP95</b>     | <b>thyroid hormone receptor-associated protein, 95-kD subunit</b>                                                                | <b>19p13.3</b>                  | <b>2.93</b> | <b>3.71</b> | <b>2.16</b> |
| <b>BAG2</b>       | <b>BCL2-associated athanogene 2</b>                                                                                              | <b>6p12.3-p11.2</b>             | <b>4.43</b> | <b>5.79</b> | <b>3.06</b> |
| <b>RAMP2</b>      | <b>receptor (calcitonin) activity modifying protein 2</b>                                                                        | <b>17q12-q21.1</b>              | <b>1.65</b> | <b>2.07</b> | <b>1.24</b> |
| <b>HOXB9</b>      | <b>homeo box B9</b>                                                                                                              | <b>17q21.3</b>                  | <b>2.18</b> | <b>2.67</b> | <b>1.70</b> |
| <b>TK1</b>        | <b>thymidine kinase 1, soluble</b>                                                                                               | <b>17q23.2-q25.3</b>            | <b>2.48</b> | <b>2.58</b> | <b>2.37</b> |
| <b>RECQL4</b>     | <b>RecQ protein-like 4</b>                                                                                                       | <b>8q24.3</b>                   | <b>2.21</b> | <b>2.43</b> | <b>1.98</b> |
| <b>CRIP2</b>      | <b>cysteine-rich protein 2</b>                                                                                                   | <b>14q32.3</b>                  | <b>2.54</b> | <b>2.81</b> | <b>2.27</b> |
| <b>EPHB2</b>      | <b>EphB2</b>                                                                                                                     | <b>1p36.1-p35</b>               | <b>2.02</b> | <b>2.44</b> | <b>1.61</b> |
| <b>OAZIN</b>      | <b>Antizyme inhibitor 1</b>                                                                                                      | <b>8q22.3</b>                   | <b>1.89</b> | <b>2.21</b> | <b>1.57</b> |
| <b>ATAD2</b>      | <b>ATPase family, AAA domain containing 2</b>                                                                                    | <b>8q24.13</b>                  | <b>2.56</b> | <b>3.06</b> | <b>2.07</b> |
| <b>FBXO5</b>      | <b>F-box only protein 5</b>                                                                                                      | <b>6q25-q26</b>                 | <b>1.96</b> | <b>2.37</b> | <b>1.54</b> |
| <b>CDC45L</b>     | <b>CDC45 cell division cycle 45-like (S. cerevisiae)</b>                                                                         | <b>22q11.21</b>                 | <b>2.21</b> | <b>2.88</b> | <b>1.54</b> |
| <b>MYBL2</b>      | <b>v-myb myeloblastosis viral oncogene homolog (avian)-like 2</b>                                                                | <b>20q13.1</b>                  | <b>2.71</b> | <b>3.39</b> | <b>2.03</b> |
| <b>ORC1L</b>      | <b>origin recognition complex, subunit 1-like (yeast)</b>                                                                        | <b>1p32</b>                     | <b>1.71</b> | <b>2.13</b> | <b>1.30</b> |
| <b>NASP</b>       | <b>nuclear autoantigenic sperm protein (histone-binding)</b>                                                                     | <b>1p34.1</b>                   | <b>1.87</b> | <b>2.40</b> | <b>1.34</b> |
| <b>KIF4A</b>      | <b>kinesin family member 4A</b>                                                                                                  | <b>Xq13.1</b>                   | <b>1.80</b> | <b>2.16</b> | <b>1.44</b> |
| <b>KIF2C</b>      | <b>kinesin-like 6 (mitotic centromere-associated kinesin)</b>                                                                    | <b>1p34.1</b>                   | <b>3.14</b> | <b>4.18</b> | <b>2.10</b> |
| <b>FBXL14</b>     | <b>F-box and leucine-rich repeat protein 14</b>                                                                                  | <b>12p13.33</b>                 | <b>2.10</b> | <b>2.52</b> | <b>1.69</b> |
| <b>RNPS1</b>      | <b>RNA binding protein S1, serine-rich domain</b>                                                                                | <b>16p13.3</b>                  | <b>2.54</b> | <b>2.78</b> | <b>2.31</b> |
| <b>RNPC1</b>      | <b>RNA-binding region (RNPI, RRM) containing 1</b>                                                                               | <b>20q13.31</b>                 | <b>2.52</b> | <b>2.86</b> | <b>2.18</b> |
| <b>DDX11</b>      | <b>DEAD/H (Asp-Glu-Ala-Asp/His) box polypeptide 11</b>                                                                           | <b>12p11</b>                    | <b>2.45</b> | <b>2.86</b> | <b>2.04</b> |
| <b>CNAP1</b>      | <b>chromosome condensation-related SMC-associated protein 1</b>                                                                  | <b>12p13.3</b>                  | <b>2.64</b> | <b>2.88</b> | <b>2.40</b> |
| <b>UBE2C</b>      | <b>ubiquitin-conjugating enzyme E2C</b>                                                                                          | <b>20q13.12</b>                 | <b>2.80</b> | <b>3.18</b> | <b>2.43</b> |
| <b>C20orf1</b>    | <b>chromosome 20 open reading frame 1</b>                                                                                        | <b>20q11.2</b>                  | <b>2.42</b> | <b>2.84</b> | <b>2.00</b> |
| <b>RAI3</b>       | <b>retinoic acid induced 3</b>                                                                                                   | <b>12p13-p12.3</b>              | <b>3.36</b> | <b>3.93</b> | <b>2.79</b> |
| <b>TBCD</b>       | <b>tubulin-specific chaperone d</b>                                                                                              | <b>17q25.3</b>                  | <b>1.82</b> | <b>2.09</b> | <b>1.55</b> |
| <b>RPA3</b>       | <b>replication protein A3 (14kD)</b>                                                                                             | <b>7p22</b>                     | <b>2.43</b> | <b>2.96</b> | <b>1.90</b> |
| <b>PTPRA</b>      | <b>protein tyrosine phosphatase, receptor type, A</b>                                                                            | <b>20p13</b>                    | <b>2.69</b> | <b>3.36</b> | <b>2.02</b> |

|                   |                                                                                      |                      |              |              |              |
|-------------------|--------------------------------------------------------------------------------------|----------------------|--------------|--------------|--------------|
| CCNB2             | <b>cyclin B2</b>                                                                     | <b>15q21.2</b>       | <b>2.62</b>  | <b>2.81</b>  | <b>2.43</b>  |
| CPSF5             | cleavage and polyadenylation specific factor 5, 25 kD subunit                        | 16q12.2              | 1.71         | 2.01         | 1.42         |
| ARAP3             | ARF-GAP, RHO-GAP, ankyrin repeat and plekstrin homology domains-containing protein 3 | 5q31.3               | 2.00         | 2.44         | 1.56         |
| C20orf24          | chromosome 20 open reading frame 24                                                  | 20q11.23             | 2.50         | 2.91         | 2.09         |
| GLE1L             | GLE1 RNA export mediator-like (yeast)                                                | 9q34.13              | 2.05         | 2.08         | 2.02         |
| POLE3             | polymerase (DNA directed), epsilon 3 (p17 subunit)                                   | 9q33                 | 2.01         | 2.09         | 1.92         |
| MCM2              | MCM2 minichromosome maintenance deficient 2, mitotin (S. cerevisiae)                 | 3q21                 | 2.17         | 2.40         | 1.93         |
| HSPC176           | Hematopoietic stem/progenitor cells 176                                              | 16q24.3              | 1.92         | 2.03         | 1.80         |
| TROAP             | trophinin associated protein (tastin)                                                | 12q13.12             | 1.83         | 2.13         | 1.53         |
| <i>Cluster C3</i> |                                                                                      |                      |              |              |              |
| BAT8              | <b>HLA-B associated transcript 8</b>                                                 | <b>6p21.3</b>        | <b>1.99</b>  | <b>2.05</b>  | <b>1.93</b>  |
| DEK               | <b>DEK oncogene (DNA binding)</b>                                                    | <b>6p23</b>          | <b>2.17</b>  | <b>1.99</b>  | <b>2.36</b>  |
| ZNF266            | <b>zinc finger protein 266</b>                                                       | <b>19p13.2</b>       | <b>2.00</b>  | <b>1.91</b>  | <b>2.10</b>  |
| TOPBP1            | <b>topoisomerase (DNA) II binding protein</b>                                        | <b>3q22.2</b>        | <b>2.23</b>  | <b>1.97</b>  | <b>2.49</b>  |
| ITPKA             | <b>inositol 1,4,5-trisphosphate 3-kinase A</b>                                       | <b>15q14-q21</b>     | <b>2.48</b>  | <b>2.13</b>  | <b>2.83</b>  |
| UBXD5             | <b>Socius</b>                                                                        | <b>1p36.11</b>       | <b>2.03</b>  | <b>2.11</b>  | <b>1.96</b>  |
| ALDH5A1           | <b>aldehyde dehydrogenase 5 family, member A1</b>                                    | <b>6p22</b>          | <b>2.03</b>  | <b>2.18</b>  | <b>1.88</b>  |
| AKNA              | <b>AT-hook transcription factor AKNA</b>                                             | <b>9q32</b>          | <b>2.29</b>  | <b>2.50</b>  | <b>2.08</b>  |
| ARL6IP            | <b>ADP-ribosylation factor-like 6</b>                                                | <b>16p12-p11.2</b>   | <b>2.12</b>  | <b>2.31</b>  | <b>1.93</b>  |
| PRIM1             | <b>primase, polypeptide 1 (49kD)</b>                                                 | <b>12q13</b>         | <b>2.34</b>  | <b>2.85</b>  | <b>1.83</b>  |
| IFIT1             | <b>interferon-induced protein 56</b>                                                 | <b>10q25-q26</b>     | <b>2.10</b>  | <b>2.28</b>  | <b>1.91</b>  |
| PPAP2C            | <b>phosphatidic acid phosphatase type 2C</b>                                         | <b>19p13</b>         | <b>4.29</b>  | <b>4.01</b>  | <b>4.56</b>  |
| FARP1             | <b>FERM, RhoGEF, and pleckstrin domain protein 1</b>                                 | <b>13q32.2</b>       | <b>2.55</b>  | <b>2.57</b>  | <b>2.52</b>  |
| MAL2              | <b>mal, T-cell differentiation protein 2</b>                                         | <b>8q23</b>          | <b>3.68</b>  | <b>3.67</b>  | <b>3.69</b>  |
| ETV1              | <b>ets variant gene 1</b>                                                            | <b>7p21.3</b>        | <b>4.10</b>  | <b>4.33</b>  | <b>3.88</b>  |
| VPS45A            | <b>vacuolar protein sorting 45A (yeast)</b>                                          | <b>1q21-q22</b>      | <b>2.09</b>  | <b>1.73</b>  | <b>2.44</b>  |
| TMOD1             | <b>tropomodulin</b>                                                                  | <b>9q22.3</b>        | <b>1.90</b>  | <b>1.58</b>  | <b>2.21</b>  |
| RAE1              | <b>RAE1 RNA export 1 homolog (S. pombe)</b>                                          | <b>20q13.31</b>      | <b>2.35</b>  | <b>2.37</b>  | <b>2.32</b>  |
| VPS41             | <b>vacuolar protein sorting 41 (yeast)</b>                                           | <b>7p14-p13</b>      | <b>1.99</b>  | <b>1.91</b>  | <b>2.07</b>  |
| IVD               | <b>isovaleryl Coenzyme A dehydrogenase</b>                                           | <b>15q14-q15</b>     | <b>2.47</b>  | <b>2.38</b>  | <b>2.56</b>  |
| CIA30             | <b>CGI-65 protein</b>                                                                | <b>15q11.2-q21.3</b> | <b>2.78</b>  | <b>2.93</b>  | <b>2.63</b>  |
| SEMA4D            | <b>semaphorin 4D</b>                                                                 | <b>9q22-q31</b>      | <b>9.55</b>  | <b>9.23</b>  | <b>9.87</b>  |
| TNXB              | <b>tenascin XB</b>                                                                   | <b>6p21.3</b>        | <b>15.95</b> | <b>13.79</b> | <b>18.11</b> |
| C20orf11          | <b>chromosome 20 open reading frame 11</b>                                           | <b>20q13.33</b>      | <b>2.15</b>  | <b>2.11</b>  | <b>2.20</b>  |
| KEAP1             | <b>Kelch-like ECH-associated protein 1</b>                                           | <b>19p13.2</b>       | <b>2.26</b>  | <b>2.17</b>  | <b>2.35</b>  |
| ANKT              | <b>nucleolar protein ANKT</b>                                                        | <b>15q13.3</b>       | <b>2.53</b>  | <b>2.26</b>  | <b>2.80</b>  |
| TOP2A             | <b>topoisomerase (DNA) II alpha (170kD)</b>                                          | <b>17q21-q22</b>     | <b>2.13</b>  | <b>2.10</b>  | <b>2.16</b>  |
| RFC4              | <b>replication factor C 4</b>                                                        | <b>3q27</b>          | <b>2.00</b>  | <b>2.00</b>  | <b>2.01</b>  |
| DHX35             | <b>DEAD/H box polypeptide 35</b>                                                     | <b>20pter-q12</b>    | <b>1.92</b>  | <b>2.05</b>  | <b>1.80</b>  |
| PIGT              | <b>Phosphatidylinositol glycan, class T</b>                                          | <b>20q12-q13.12</b>  | <b>2.10</b>  | <b>1.95</b>  | <b>2.25</b>  |
| ERGIC3            | <b>ERGIC and golgi 3</b>                                                             | <b>20pter-q12</b>    | <b>1.99</b>  | <b>2.10</b>  | <b>1.87</b>  |
| TAF7              | <b>TAF7 RNA polymerase II, 55 kD</b>                                                 | <b>5q31</b>          | <b>2.11</b>  | <b>2.06</b>  | <b>2.16</b>  |
| F8A1              | <b>coagulation factor VIII-associated protein</b>                                    | <b>Xq28</b>          | <b>2.16</b>  | <b>2.07</b>  | <b>2.24</b>  |
| SEN2              | <b>sentrin-specific protease</b>                                                     | <b>3q27.2</b>        | <b>2.06</b>  | <b>1.82</b>  | <b>2.30</b>  |
| GOLGA1            | <b>golgi autoantigen, golgin subfamily a, 1</b>                                      | <b>9q34.11</b>       | <b>2.02</b>  | <b>1.78</b>  | <b>2.27</b>  |
| TIMP2             | <b>tissue inhibitor of metalloproteinase 2</b>                                       | <b>17q25</b>         | <b>4.73</b>  | <b>5.39</b>  | <b>4.07</b>  |
| IL10RB            | <b>interleukin 10 receptor, beta</b>                                                 | <b>21q22.11</b>      | <b>2.08</b>  | <b>2.10</b>  | <b>2.07</b>  |
| NEK2              | <b>NIMA-related kinase 2</b>                                                         | <b>1q32.2-q41</b>    | <b>2.20</b>  | <b>2.03</b>  | <b>2.37</b>  |
| TNFAIP2           | <b>TNF, alpha-induced protein 2</b>                                                  | <b>14q32</b>         | <b>9.21</b>  | <b>11.33</b> | <b>7.09</b>  |
| PPGB              | <b>protective protein for beta-galactosidase</b>                                     | <b>20q13.1</b>       | <b>2.02</b>  | <b>2.21</b>  | <b>1.83</b>  |
| OVCA2             | <b>ovarian cancer gene-2 protein</b>                                                 | <b>17p13.3</b>       | <b>1.97</b>  | <b>1.84</b>  | <b>2.10</b>  |
| HOXB7             | <b>homeo box B7</b>                                                                  | <b>17q21-q22</b>     | <b>2.17</b>  | <b>2.08</b>  | <b>2.27</b>  |
| SDR1              | <b>short-chain dehydrogenase/reductase 1</b>                                         | <b>1p36.1</b>        | <b>4.71</b>  | <b>5.27</b>  | <b>4.14</b>  |
| APIP              | <b>APAF1 interacting protein</b>                                                     | <b>11p13</b>         | <b>2.01</b>  | <b>2.17</b>  | <b>1.84</b>  |

|                 |                                                                           |                 |             |              |             |
|-----------------|---------------------------------------------------------------------------|-----------------|-------------|--------------|-------------|
| <b>HTATIP2</b>  | <b>HIV-1 Tat interactive protein 2, 30 kD</b>                             | <b>11p15.1</b>  | <b>2.54</b> | <b>2.46</b>  | <b>2.62</b> |
| <b>PORIMIN</b>  | <b>pro-oncosis receptor inducing membrane injury gene</b>                 | <b>11q22.1</b>  | <b>1.97</b> | <b>2.10</b>  | <b>1.84</b> |
| <b>C20orf35</b> | <b>chromosome 20 open reading frame 169</b>                               | <b>20q13.12</b> | <b>1.85</b> | <b>2.04</b>  | <b>1.65</b> |
| <b>CLDN7</b>    | <b>claudin 7</b>                                                          | <b>17p13</b>    | <b>8.62</b> | <b>10.67</b> | <b>6.56</b> |
| <b>CGN</b>      | <b>cingulin</b>                                                           | <b>1q21</b>     | <b>2.42</b> | <b>2.90</b>  | <b>1.93</b> |
| <b>TACSTD1</b>  | <b>tumor-associated calcium signal transducer 1</b>                       | <b>4q</b>       | <b>6.35</b> | <b>8.27</b>  | <b>4.43</b> |
| FLOT1           | flotillin 1                                                               | 6p21.3          | 2.63        | 2.71         | 2.56        |
| ELF3            | E74-like factor 3 (ets domain transcription factor, epithelial-specific ) | 1q32.2          | 7.49        | 7.98         | 6.99        |
| CD151           | CD151 antigen                                                             | 11p15.5         | 11.53       | 13.49        | 9.57        |
| SULT1A4         | Sulfotransferase family, cytosolic, 1A, phenol-preferring, member 4       | 16p11.2         | 2.07        | 1.99         | 2.15        |
| PP1B            | peptidylprolyl isomerase B (cyclophilin B)                                | 15q21-q22       | 2.35        | 2.34         | 2.35        |
| SLC12A7         | solute carrier family 12 (potassium/chloride transporters), member 7      | 5p15            | 2.10        | 2.03         | 2.17        |
| AARS            | alanyl-tRNA synthetase                                                    | 16q22           | 2.28        | 2.13         | 2.44        |
| SEZ6L2          | Seizure related 6 homolog (mouse)-like 2                                  | 16p11.2         | 3.23        | 3.03         | 3.44        |
| GABARAPL1       | GABA(A) receptor-associated protein like 1                                | 12p13.31        | 2.31        | 2.25         | 2.37        |
| ATP9A           | ATPase, Class II, type 9A                                                 | 20q13.11-13.2   | 2.56        | 2.86         | 2.25        |
| PIM1            | pim-1 oncogene                                                            | 6p21.2          | 2.05        | 2.25         | 1.84        |
| TNP1            | transition protein 1 (during histone to protamine replacement)            | 16p13.13        | 2.03        | 2.18         | 1.88        |
| DPP7            | dipeptidylpeptidase 7                                                     | 9q34.3          | 2.59        | 2.56         | 2.61        |
| SPOCK1          | sparc/osteonectin, cwcv and kazal-like domains proteoglycan (testican) 1  | 5q31            | 2.07        | 1.70         | 2.44        |
| FOXM1           | forkhead box M1                                                           | 12p13           | 2.52        | 2.47         | 2.57        |
| PMS2            | PMS2 postmeiotic segregation increased 2 (S. cerevisiae)                  | 7p22            | 2.05        | 1.78         | 2.31        |
| SLC27A2         | fatty-acid-Coenzyme A ligase, very long-chain 1                           | 15q21.2         | 1.98        | 2.42         | 1.54        |
| GATA2           | GATA binding protein 2                                                    | 3q21            | 2.48        | 2.88         | 2.07        |
| EPB41L4B        | EHM2 gene                                                                 | 9q22.1-q22.3    | 2.04        | 1.91         | 2.17        |
| BLMH            | bleomycin hydrolase                                                       | 17q11.2         | 2.13        | 2.29         | 1.96        |
| CYBA            | cytochrome b-245, alpha polypeptide                                       | 16q24           | 10.55       | 14.32        | 6.78        |
| CTSH            | cathepsin H                                                               | 15q24-q25       | 4.55        | 5.42         | 3.68        |
| ALDH1A3         | aldehyde dehydrogenase 1 family, member A3                                | 15q26           | 2.65        | 2.90         | 2.39        |
| KHK             | ketohexokinase (fructokinase)                                             | 2p23.3-p23.2    | 2.15        | 2.56         | 1.75        |
| LCN2            | lipocalin 2 (oncogene 24p3)                                               | 9q34            | 2.97        | 3.30         | 2.65        |
| KLRC2           | killer cell lectin-like receptor subfamily C, member 2                    | 12p13           | 2.04        | 2.82         | 1.25        |
| CED-6           | CED-6 protein                                                             | 2q32.3-q33      | 2.25        | 2.56         | 1.93        |

Shown are gene list and fold change in cluster C over-expressed in Head and Neck Squamous Cell Carcinoma (HNSCC).

<sup>1</sup> Order of gene refers to the order in the tree. Shown in bold are three subclusters C1, C2 and C3 of cluster C.

<sup>2</sup> fold change = average of 10 HNSCC vs. average of 4 Human Normal Keratinocytes (HKC)

<sup>3</sup> fold change = average of 5 HNSCC of wild type (wt) p53-like vs. average of 4 HKC

<sup>4</sup> fold change = average of 5 HNSCC of mutant (mt) p53 vs. average of 4 HKC
