# Supplementary material for: Genome-wide identification of novel expression signatures reveal distinct patterns and prevalence of binding motifs for p53, nuclear factor-κB and other signal transcription factors in head and neck squamous cell carcinoma
Source: Springer Nature journal article supplement (doi:10.1186/gb-2007-8-5-r78), 2007-05-11
Supplement: Additional file 2 [file gb-2007-8-5-r78-s2.pdf]

Supplemental Table S2. Gene Ontology Annotation of HNSCC clusters

| Cluster                       | Number <sup>1</sup> | % <sup>2</sup> | Gene Ontology Annotation                                 | P value <sup>3</sup>   |
|-------------------------------|---------------------|----------------|----------------------------------------------------------|------------------------|
| <b><i>Up-regulated:</i></b>   |                     |                |                                                          |                        |
| A                             | 8                   | 23.5           | nucleosome assembly                                      | 1.40×10 <sup>-12</sup> |
|                               | 7                   | 20.6           | chromosome organization and biogenesis (sensu Eukaryota) | 8.82×10 <sup>-10</sup> |
|                               | 9                   | 26.5           | DNA binding                                              | 1.19×10 <sup>-4</sup>  |
|                               | 3                   | 8.8            | transport                                                | 1.65×10 <sup>-2</sup>  |
|                               | 3                   | 8.8            | calcium ion binding                                      | 3.53×10 <sup>-2</sup>  |
| B                             | 3                   | 8.1            | negative regulation of cell proliferation                | 1.60×10 <sup>-3</sup>  |
|                               | 4                   | 10.8           | cell-cell signaling                                      | 1.60×10 <sup>-3</sup>  |
|                               | 3                   | 8.1            | cell surface receptor linked signal transduction         | 2.00×10 <sup>-3</sup>  |
|                               | 9                   | 24.3           | protein binding                                          | 4.80×10 <sup>-3</sup>  |
|                               | 4                   | 10.8           | DNA binding                                              | 3.80×10 <sup>-2</sup>  |
| C                             | 10                  | 4.2            | DNA replication                                          | 2.53×10 <sup>-4</sup>  |
|                               | 8                   | 3.3            | ubiquitin cycle                                          | 3.86×10 <sup>-2</sup>  |
|                               | 6                   | 2.5            | cell division                                            | 4.40×10 <sup>-2</sup>  |
|                               | 9                   | 3.8            | catalytic activity                                       | 5.10×10 <sup>-3</sup>  |
|                               | 15                  | 6.3            | oxidoreductase activity                                  | 2.20×10 <sup>-2</sup>  |
| C1                            | 3                   | 6.7            | lipid metabolism                                         | 7.09×10 <sup>-3</sup>  |
|                               | 3                   | 6.7            | inflammatory response                                    | 3.84×10 <sup>-3</sup>  |
|                               | 4                   | 8.8            | oxidoreductase activity                                  | 1.34×10 <sup>-2</sup>  |
|                               | 4                   | 8.8            | calcium ion binding                                      | 2.53×10 <sup>-2</sup>  |
|                               | 7                   | 15.6           | regulation of transcription, DNA-dependent               | 2.47×10 <sup>-2</sup>  |
| C2                            | 4                   | 10.3           | mitosis                                                  | 3.45×10 <sup>-5</sup>  |
|                               | 4                   | 10.3           | DNA replication                                          | 4.87×10 <sup>-5</sup>  |
|                               | 4                   | 10.3           | regulation of cell cycle                                 | 4.21×10 <sup>-4</sup>  |
|                               | 8                   | 20.5           | ATP binding                                              | 1.16×10 <sup>-3</sup>  |
|                               | 4                   | 10.3           | nucleotide binding                                       | 1.34×10 <sup>-3</sup>  |
| C3                            | 2                   | 4.0            | intracellular transporter activity                       | 3.50×10 <sup>-4</sup>  |
|                               | 2                   | 4.0            | phosphoinositide-mediated signaling                      | 7.61×10 <sup>-4</sup>  |
|                               | 3                   | 6.0            | DNA replication                                          | 5.67×10 <sup>-3</sup>  |
|                               | 3                   | 6.0            | DNA repair                                               | 6.50×10 <sup>-3</sup>  |
|                               | 3                   | 6.0            | binding                                                  | 2.59×10 <sup>-2</sup>  |
| <b><i>Down-regulated:</i></b> |                     |                |                                                          |                        |
| D                             | 14                  | 5.6            | epidermis development                                    | 1.40×10 <sup>-12</sup> |
|                               | 17                  | 6.8            | structural molecule activity                             | 2.85×10 <sup>-6</sup>  |
|                               | 9                   | 3.6            | structural constituent of cytoskeleton                   | 2.91×10 <sup>-4</sup>  |
|                               | 14                  | 5.6            | cell adhesion                                            | 7.20×10 <sup>-3</sup>  |
|                               | 11                  | 4.4            | cell-cell signaling                                      | 1.00×10 <sup>-2</sup>  |
|                               | 10                  | 4.0            | cell differentiation                                     | 1.10×10 <sup>-2</sup>  |
|                               | 10                  | 4.0            | immune response                                          | 2.90×10 <sup>-2</sup>  |
|                               | 18                  | 7.2            | calcium ion binding                                      | 2.60×10 <sup>-2</sup>  |
|                               | 16                  | 6.4            | regulation of transcription, DNA-dependent               | 4.90×10 <sup>-2</sup>  |
| E                             | 21                  | 10.0           | calcium ion binding                                      | 4.58×10 <sup>-4</sup>  |
|                               | 9                   | 4.3            | actin binding                                            | 7.60×10 <sup>-3</sup>  |
|                               | 29                  | 13.7           | signal transduction                                      | 1.30×10 <sup>-2</sup>  |
|                               | 11                  | 5.2            | cell proliferation                                       | 2.40×10 <sup>-2</sup>  |
|                               | 8                   | 3.8            | G-protein coupled receptor protein signaling pathway     | 3.00×10 <sup>-2</sup>  |

|   |    |     |                                              |                       |
|---|----|-----|----------------------------------------------|-----------------------|
|   | 9  | 4.3 | regulation of cell cycle                     | $3.80 \times 10^{-2}$ |
|   | 9  | 4.3 | signal transducer activity                   | $4.00 \times 10^{-2}$ |
| F | 6  | 3.1 | heparin binding                              | $8.28 \times 10^{-4}$ |
|   | 7  | 3.6 | morphogenesis                                | $2.90 \times 10^{-3}$ |
|   | 6  | 3.1 | serine-type endopeptidase inhibitor activity | $2.40 \times 10^{-3}$ |
|   | 4  | 2.0 | damaged DNA binding                          | $5.50 \times 10^{-3}$ |
|   | 6  | 3.1 | positive regulation of cell proliferation    | $7.10 \times 10^{-3}$ |
|   | 11 | 5.6 | cell adhesion                                | $1.90 \times 10^{-2}$ |
|   | 8  | 4.1 | cell differentiation                         | $2.30 \times 10^{-2}$ |
|   | 5  | 2.6 | DNA binding                                  | $4.52 \times 10^{-2}$ |

Shown are Gene Ontology (GO) annotation in up-regulated cluster A-C and down-regulated D-F in Head and Neck Squamous Cell Carcinoma (HNSCC). C1, C2 and C3 were three subclusters in cluster C. Genes were mapped to GO Biological process and Molecular function by using Onto-Express (Draghici et al. 2003). <sup>2</sup> refer to gene number for a mapped functional GO category within the entire cluster. <sup>3</sup> refer to percentage of gene within the entire cluster for a mapped functional GO category. <sup>4</sup> indicate corrected *P* value for statistical significant enrichment.
